# Supplementary material
Source: PubMed Central journal article supplement (PMC3544301)
Supplement: NIHMS415561-supplement.pdf [file NIHMS415561-supplement.pdf]

## Supporting Information

© Copyright Wiley-VCH Verlag GmbH & Co. KGaA, 69451 Weinheim, 2008

# **Molecular Recognition of Small Cell Lung Cancer Cells Using Aptamers**

Hui William Chen, Colin D. Medley, Josh E. Smith, Kwame Sefah, Dihua Shanguan, Zhiwen Tang, Ling Meng, and Professor. Dr. Weihong Tan<sup>\*[a]</sup>

## Supporting Information

Multiple sequence alignment analysis (selected sequences studied in this work)

| Motif 1 | NAME        | START | P-VALUE  | SITES                                      |
|---------|-------------|-------|----------|--------------------------------------------|
|         | C2-7-40-A12 | 2     | 1.92e-16 | G TGGATTGTTGTGTTCTGTTGGTTTTTGTG TTGTC      |
|         | C2-8-40-F10 | 2     | 1.92e-16 | G TGGATTGTTGTGTTCTGTTGGTTTTTGTG TTGTC      |
|         | C2-4-20-E08 | 2     | 1.92e-16 | G TGGATTGTTGTGTTCTGTTGGTTTTTGTG TTGTC      |
|         | C2-2-20-G02 | 5     | 5.07e-13 | GGTG TGTGTTTTTGTGTTTTGCTTGGTGTGTTGTC       |
|         | C2-4-20-F04 | 6     | 3.46e-11 | GCGGT TCTGTGGTTGTTGTTGTGTTGTTTTTTG G       |
|         | C2-4-20-G08 | 7     | 4.06e-11 | GGTCGG TGTGTTTTGTTGTTTTTGTGCTTTTTTC        |
|         | C2-3-20-D02 | 1     | 6.41e-11 | GGGTGTGTTGTTTTGTTTGTTCCTTGGTG ATTTG        |
|         | C2-4-20-F03 | 4     | 6.73e-11 | CGG TGTGTTTCGTCGTGTTTTGTTGTATGTG TG        |
| Motif 2 | NAME        | START | P-VALUE  | SITES                                      |
|         | C2-5-40-C03 | 7     | 3.44e-15 | TCCGTG CCACTGGCCCCCGGTGCCCCGGTCCCCGG       |
|         | C2-5-40-C09 | 7     | 3.44e-15 | TCCGTG CCACTGGCCCCCGGTGCCCCGGTCCCCGG       |
|         | C2-5-40-A10 | 7     | 3.44e-15 | TCCGTG CCACTGGCCCCCGGTGCCCCGGTCCCCGG       |
|         | C2-2-20-H12 | 1     | 2.16e-10 | ACACCAGCGTACCTTGGTTCGGGTCCCTGG GCGCAT      |
|         | C2-8-40-G03 | 3     | 2.35e-10 | GC ACCTTCGTACCCCCACCTCCGGCCCCGTGC TCC      |
|         | C2-8-40-G06 | 3     | 2.35e-10 | GC ACCTTCGTACCCCCACCTCCGGCCCCGTGC TCC      |
|         | C2-2-20-G06 | 1     | 2.35e-10 | ACACCAGCGTACCTTGGTTCGGGTCCCTGC TCTGAT      |
|         | C2-5-40-B08 | 2     | 1.12e-08 | C CACCCGACACTTCGTTCGTCCGTCCCCTTT TCCCG     |
|         | C2-3-20-B05 | 5     | 1.12e-08 | CCGA CCTCTCGTTCCTCGTGTCCCATCCCCCG CT       |
|         | C2-2-20-F09 | 4     | 1.21e-08 | GGC TCCGTTACCCTCGTTCGACCTGCCCCCGC GTG      |
| Motif 3 | NAME        | START | P-VALUE  | SITES                                      |
|         | C2-6-40-H02 | 5     | 1.89e-18 | GCCG ATGTCAACTTTTTCTAACTCACTGGTTTT GC      |
|         | C2-7-40-C06 | 5     | 1.89e-18 | GCCG ATGTCAACTTTTTCTAACTCACTGGTTTT GC      |
|         | C2-2-20-E04 | 5     | 1.89e-18 | GCCG ATGTCAACTTTTTCTAACTCACTGGTTTT GC      |
|         | C2-2-20-G08 | 5     | 1.89e-18 | GCCG ATGTCAACTTTTTCTAACTCACTGGTTTT GC      |
|         | C2-2-20-H02 | 5     | 1.89e-18 | GCCG ATGTCAACTTTTTCTAACTCACTGGTTTT GC      |
|         | C2-4-20-H07 | 5     | 1.89e-18 | GCCG ATGTCAACTTTTTCTAACTCACTGGTTTT GC      |
|         | C2-6-40-G02 | 5     | 3.94e-18 | GCCG ATGTCATCTTTTTCTAACTCACTGGTTTT GC      |
|         | C2-2-20-E11 | 1     | 5.75e-13 | GCAACCTCTCTTTCAACTTCACTGGTTCT ATTCTC       |
| Motif 4 | NAME        | START | P-VALUE  | SITES                                      |
|         | C2-2-20-G11 | 3     | 3.39e-14 | GC GGAAAATTAAGTTATTCTGCCCCCTCGA CTCAGCTGAG |
|         | C2-1-20-D07 | 3     | 4.61e-14 | CT GGATCTTAAAGATTGCATGCGCTCACTA TGGGA      |
|         | C2-4-20-H01 | 3     | 4.61e-14 | CT GGATCTTAAAGATTGCATGCGCTCACTA TGGGA      |
|         | C2-2-20-F11 | 3     | 1.06e-13 | GC AGAAAATTAAGTTATTCTGCCCCCTCGA CTCCG      |

**Supporting Figure 1.** Multiple Sequence Alignment Analysis of Sequencing Results with MEME Version 3.5.3 (motif 1 refers to aptamer HCA12, motif 2 refers to aptamer HCC03, motif 3 refers to aptamer HCH07, motif 4 refers to aptamer HCH01)

Specific Binding of Aptamer HCC03 to NCI-H69 Cells

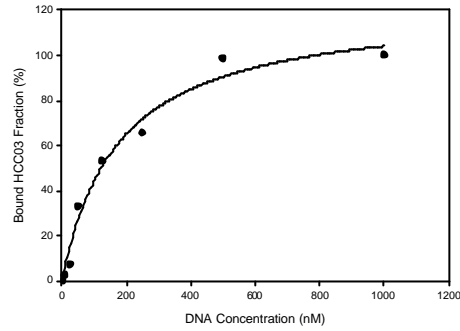

**Supporting Figure 2. Saturation Analysis of HCC03** (Saturation analysis was performed to measure the relative cell surface binding affinities of developed aptamers. Cells were incubated with FITC labeled aptamers at 4°C for 30 minutes, washed three times with 400  $\mu$ L washing buffer, and finally re-suspended in 400  $\mu$ L binding buffer containing 20% FBS. Cells were then assayed using flow cytometry. Concentrations of FITC labeled aptamers for the relative affinity measurements varied from 0 to 1  $\mu$ M. The FITC labeled ssDNA library was used to determine nonspecific binding. The mean fluorescence intensity of aptamer bound cells (nonspecific binding of DNA library subtracted) was used to calculate bound aptamer fraction at different concentrations. All affinity measurements were performed in triplicate. The results are described as mean  $\pm$  s.e.m. The equilibrium dissociation constants ( $K_d$ ) were obtained by fitting the cell surface binding data of aptamers to a one-site saturation model with SigmaPlot 9.0 (Jandel Scientific). In addition, the apparent  $K_d$  obtained in this experiment is considered to be higher than the accurate  $k_d$  due to the error brought in by population of dead cell.)

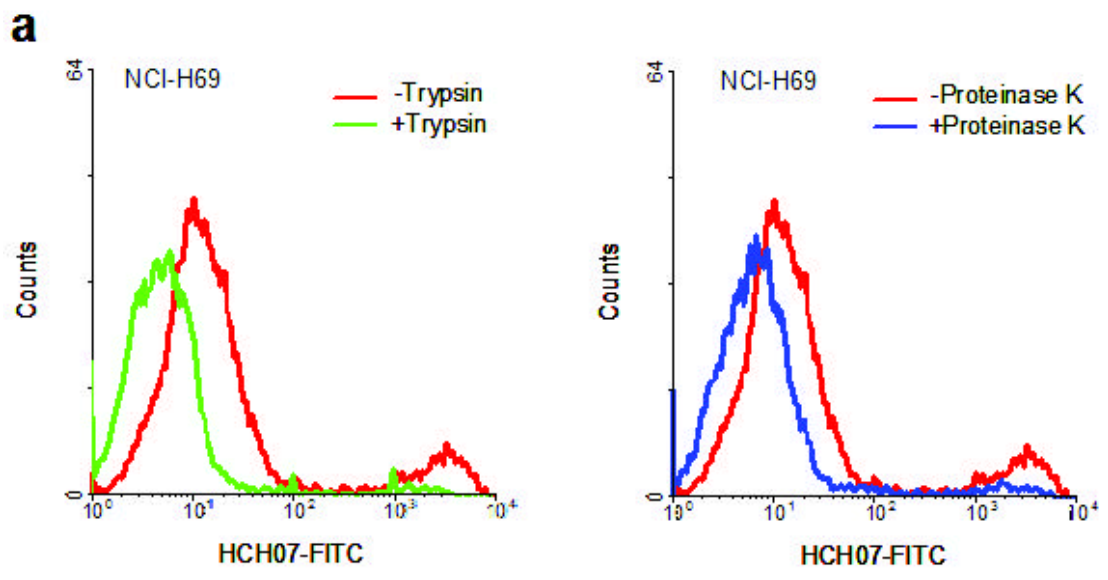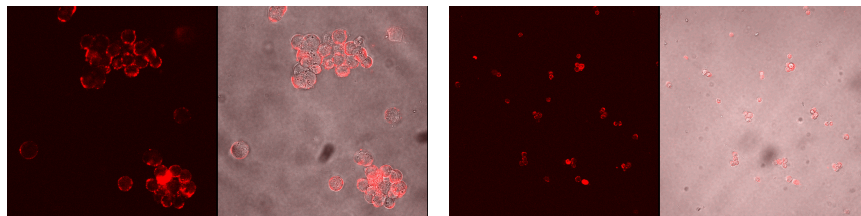

W/O Treatment

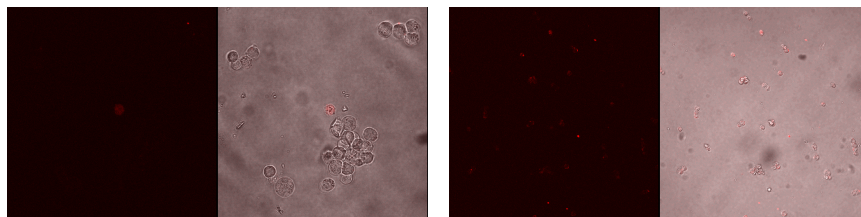

W/ Trypsin 2 min

**Supporting Figure 3.** Flow Cytometry Assay of Aptamer Target Protein Studies and Confocal Imaging of Aptamer Target Protein Studies

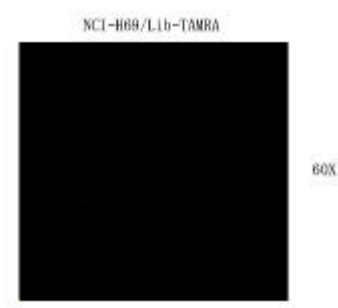

**Supporting Figure 4.** Fluorescent ssDNA library stained SCLC cell line tissue array as control by magnified confocal imaging (60x magnification).
